# Supplementary material for: Learning vector quantization as an interpretable classifier for the detection of SARS-CoV-2 types based on their RNA sequences
Source: Springer Nature journal article supplement (doi:10.1007/s00521-021-06018-2), 2021-04-27
Supplement: 521_2021_6018_MOESM1_ESM.pdf [file 521_2021_6018_MOESM1_ESM.pdf]

# Figures

496

S1 Fig.

497

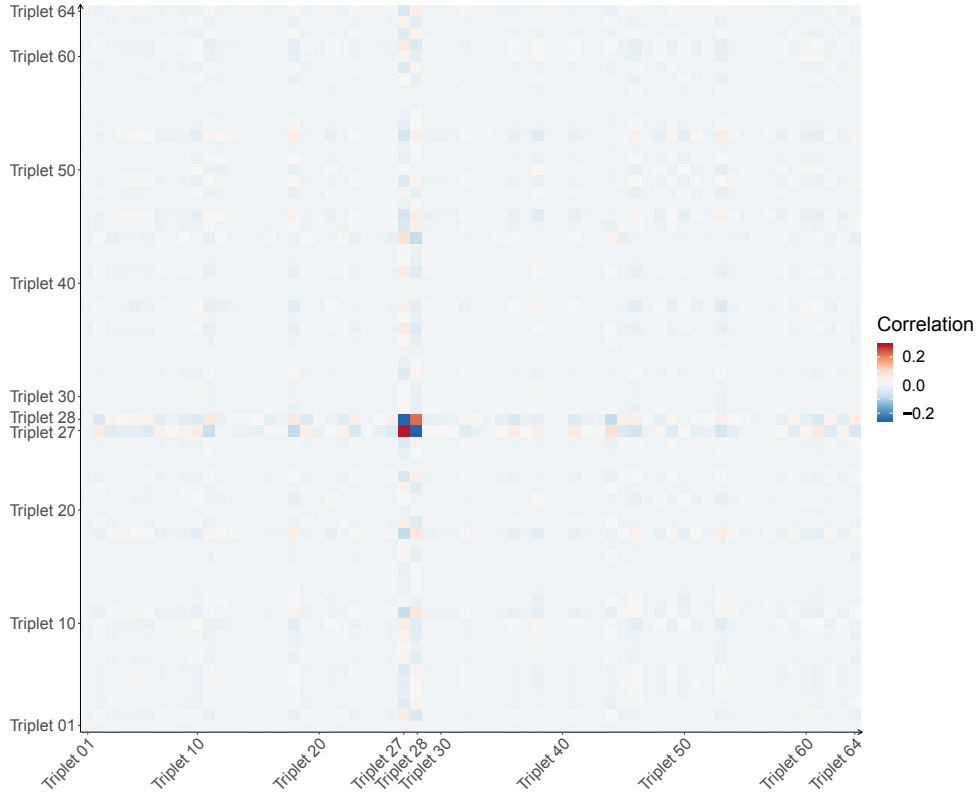

**Visualization of the classification-correlation matrix.** The classification-correlation matrix provides the linear correlations among the triplet frequencies of the sequences, which contribute to the class discrimination.

498

499

500

501

S2 Fig.

502

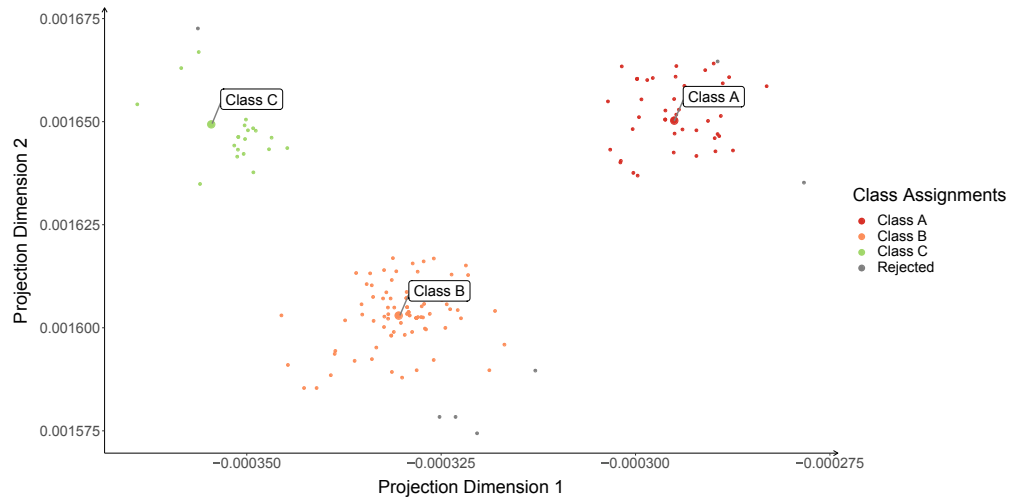

503

**Visualization of the GMLVQ result for  $D_G$ -data.** The data as well as the the GMLVQ-prototypes are mapped using the learned  $\Omega$ -matrix. The data points are colored either regarding their class assignments or regarding their reject decision. The GMLVQ-prototypes serve as class representatives. However, they are not identical with the mean vectors of the classes.

504  
505  
506  
507  
508

**S3 Fig.**

509

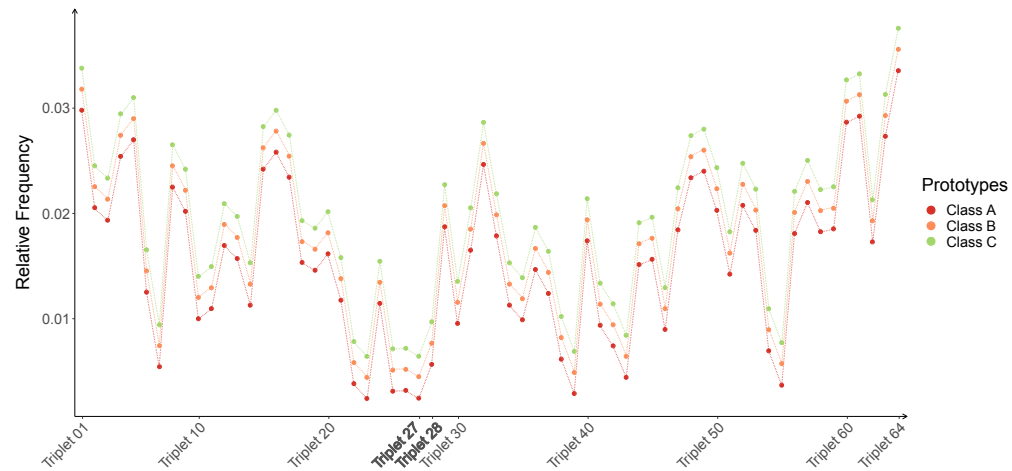

510  
511  
512  
513

**Visualization of the GMLVQ prototypes.** The color of the prototypes is in agreement with the class coloring in S2 Fig. Further, the prototypes are vertically shifted by small offsets for better visualization and separation.

**S4 Fig.**

514

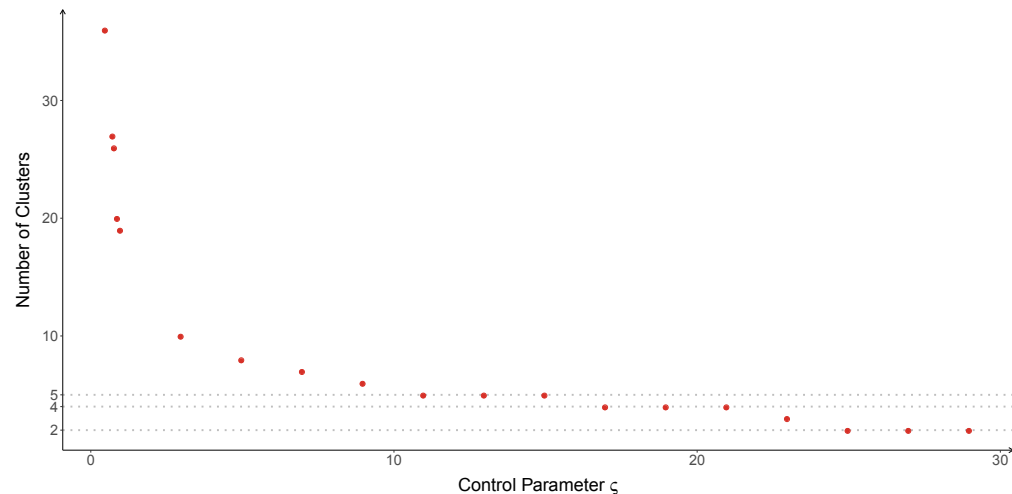

515  
516  
517  
518

**Stability of AP cluster solutions for  $D_{NB}$ -data.** The number of clusters in dependence on the control parameter  $\varsigma$  is depicted. Plateaus refer to stable cluster solutions. Accordingly, we identify 2-, 4-, and 5-cluster solutions as most recommended.

S5 Fig.

519

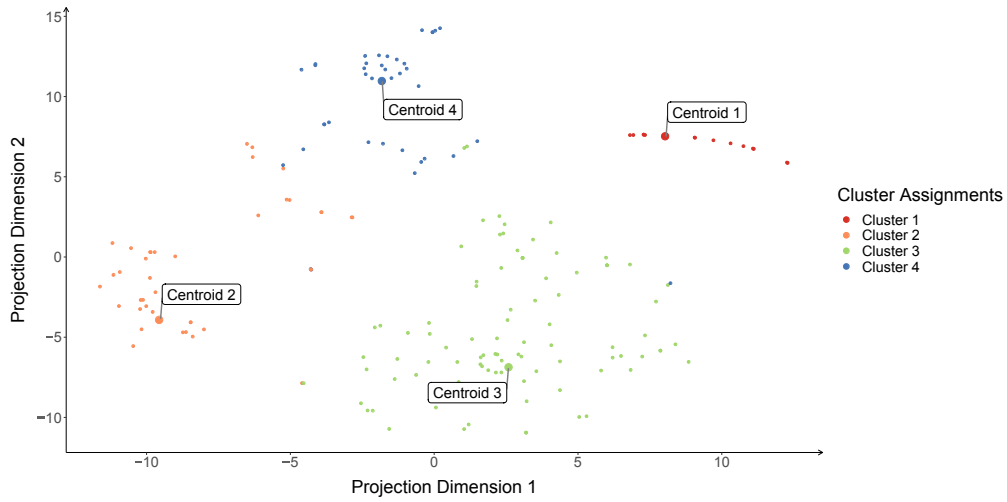

520

Visualization of the AP clustering result for  $D_{NB}$ -data using 4 clusters. The data as well as the cluster centroids are depicted using the  $t$ -SNE.

521

522

S6 Fig.

523

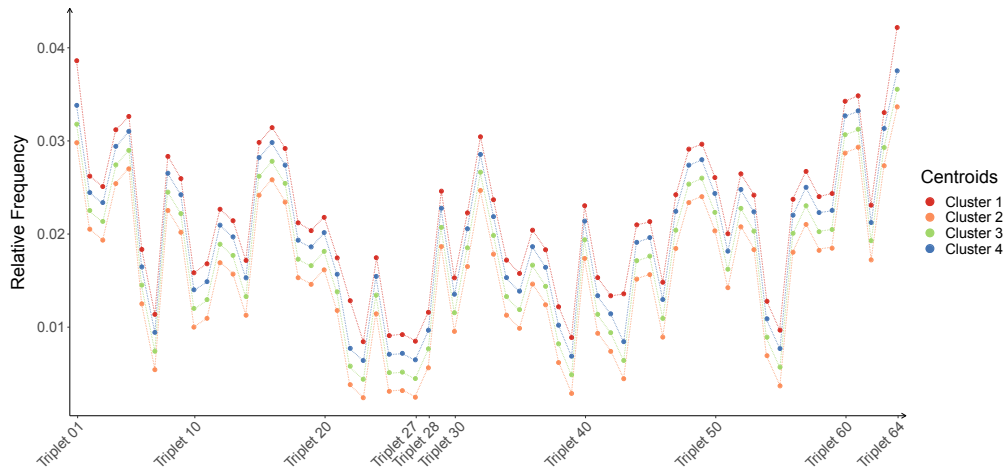

524

Visualization of the AP cluster centroids for  $D_{NB}$ -data using the 4-cluster solution. The color of the cluster centroids is in agreement with the cluster coloring in S5 Fig. Further, the centroids are vertically shifted by small offsets for better visualization and separation.

525

526

527

528

S7 Fig.

529

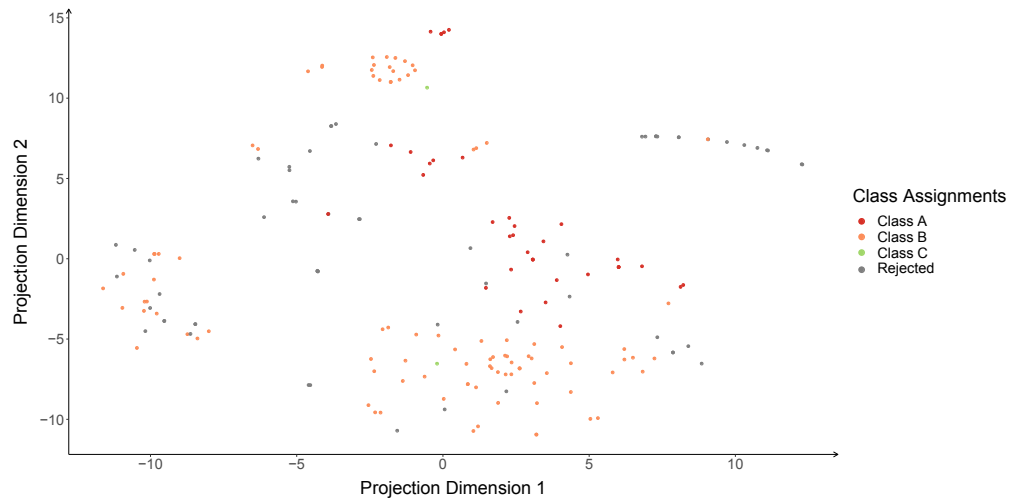

Visualization of GMLVQ classification for the  $D_{NB}$ -data by  $t$ -SNE. The class coloring is as in S2 Fig.

530

531

532

S8 Fig.

533

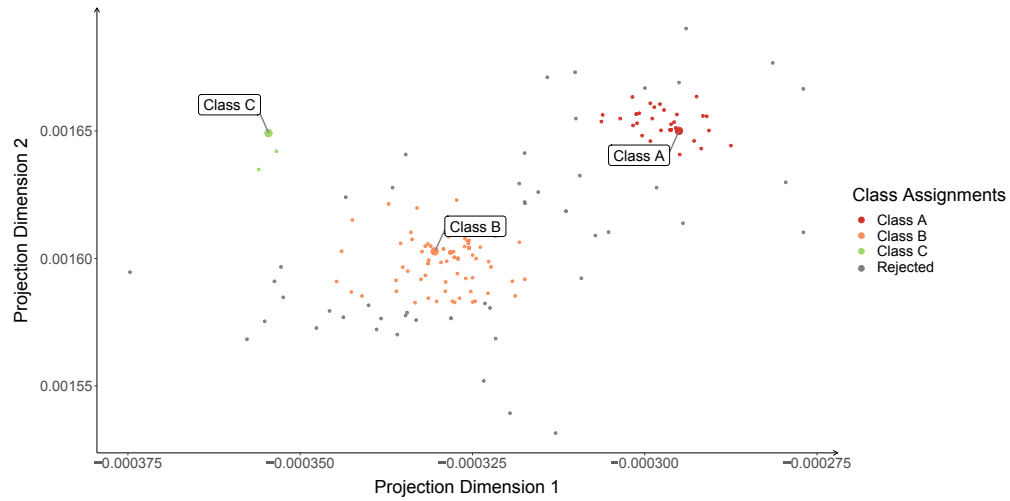

Visualization of GMLVQ classification for the  $D_{NB}$ -data by  $\Omega$ -mapping. The data as well as the GMLVQ prototypes are depicted. The class coloring is as in S2 Fig.

534

535

536

S9 Fig.

537

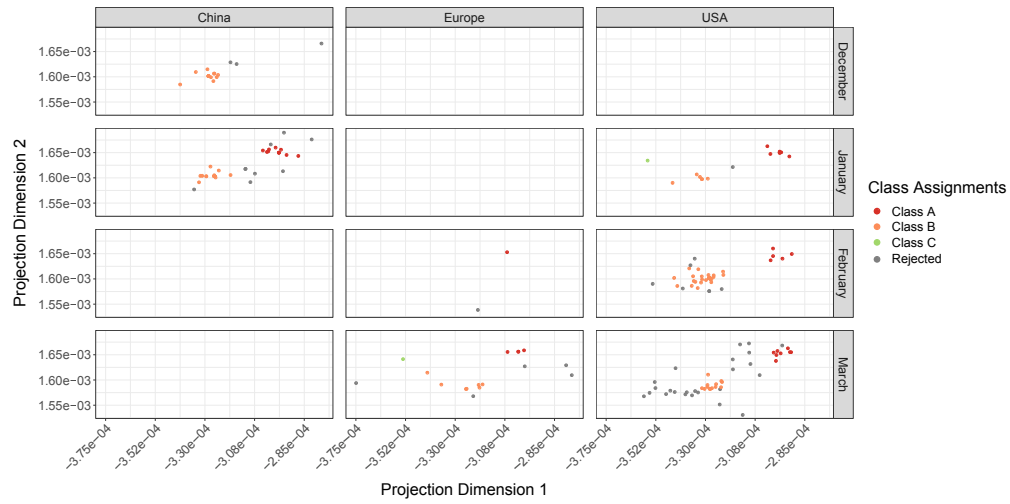

538

**Distribution of the  $D_{NB}$ -data depending on the geographic origin and the collection date.** A distribution of the data from the  $D_{NB}$ -dataset with respect to the geographic sequence origin and the collection date together with the class assignments. Again, the mappings are realized by the  $\Omega$  matrix. The class coloring is as in S2 Fig.

539

540

541

542

S10 Fig.

543

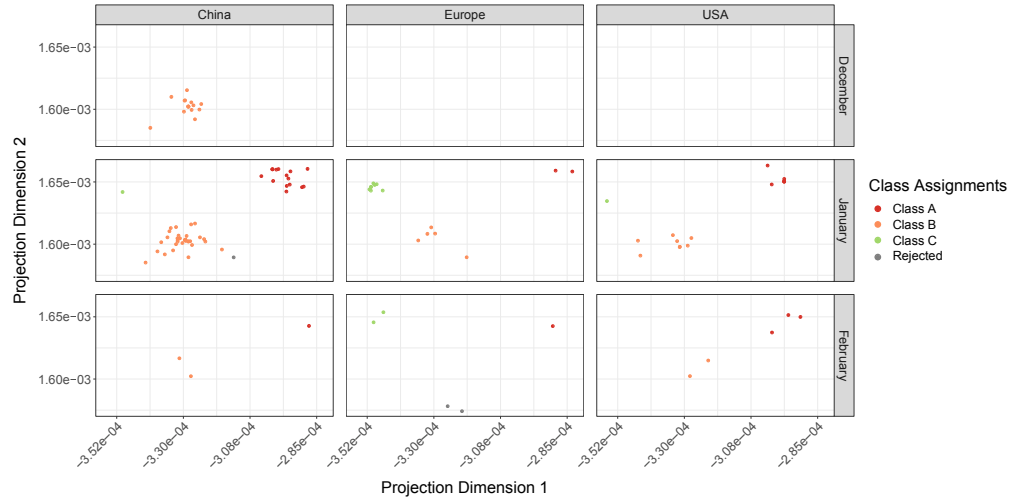

544

**Distribution of the  $D_G$ -data depending on the geographic origin and the collection date.** A distribution of the data from the  $D_G$ -dataset with respect to the geographic sequence origin and the collection date together with the class assignments. Again, the mappings are realized by the  $\Omega$  matrix. The class coloring is as in S2 Fig.

545

546

547

548

S11 Fig.

549

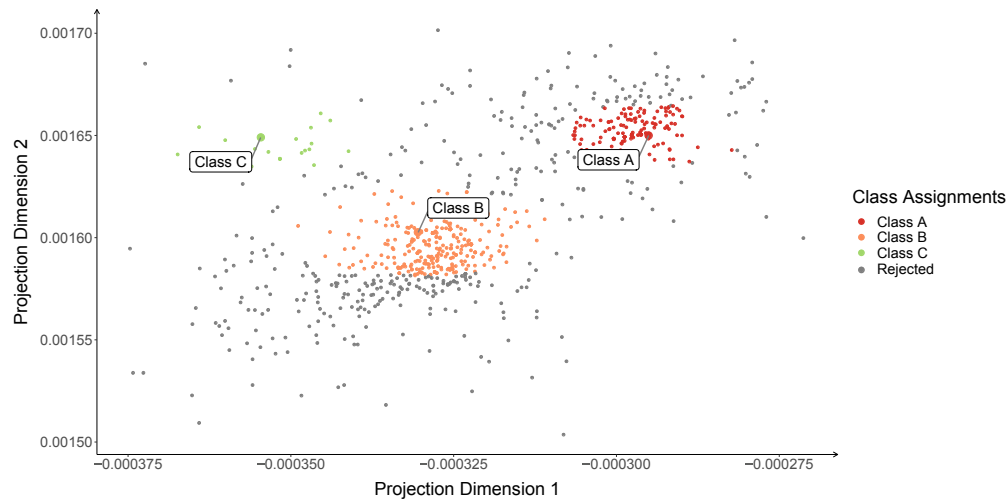

550

**Visualization of GMLVQ classification for the full  $D_N$ -data by  $\Omega$ -mapping.**

551

The data as well as the GMLVQ prototypes are depicted. The class coloring is as in S2 Fig.

552

553

**S12 Data Data Files** The data file 'S12 Data.xlsx' (Excel) contains the accession numbers of both datasets  $D_G$  and  $D_N$ . Further collection date and origin (region) are attached. For the  $D_G$  dataset, additionally, the type information (class assignment) is given.

554

555

556

557

**S13 Histogram Coding of Nucleotide Triplets Assignment of the histogram dimensions to the nucleotide triplets** For each of the 64 nucleotide combinations, the coding by the histogram dimensions is given in the file 'S13 Histogram Coding.xlsx'.

558

559

560

561

**S14 GMLVQ Mapping for  $D_N$  Virus type assignments for the  $D_N$ -sequences obtained by GMLVQ** For each sequence in  $D_N$ , the class/type assignment obtained by the GMLVQ model is given as well as if a rejection decision was made according to the SCE of the GMLVQ model. Additionally, we provide the sequences from  $D_G$ , which were rejected by the SCE decision of the GMLVQ model. The respective file is 'S14 GMLVQMapping.xlsx'.

562

563

564

565

566

567
